# Supplementary material for: A gain of function mutation in SlNRC4a enhances basal immunity resulting in broad-spectrum disease resistance
Source: PubMed Central journal article supplement (PMC7393091; doi:10.1038/s42003-020-01130-w), 2020-07-30
Supplement: 42003_2020_1130_MOESM1_ESM.pdf [file 42003_2020_1130_MOESM1_ESM.pdf]

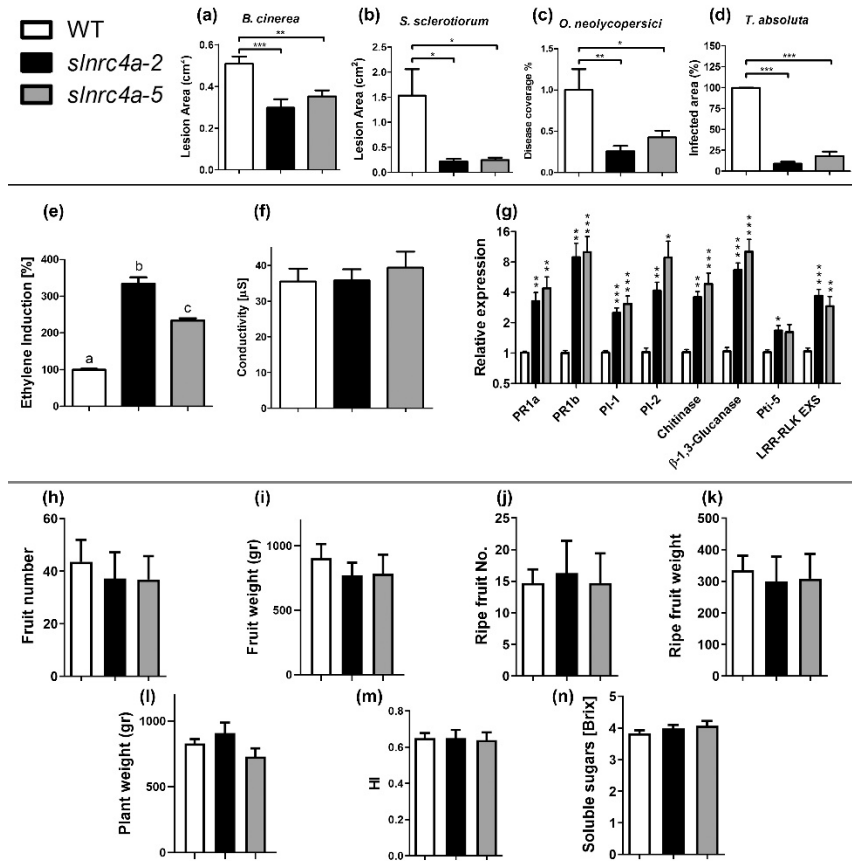

**Supplementary Figure 1: Enhanced disease resistance, enhanced basal defense parameters, and agronomic traits of *slnrc4a* line#2 and *slnrc4a* line#5.**

Select parameters from Figure 1- pathogen resistance (a-d), Figure 2- steady state defense parameters (e-g), and Figure 5- agricultural traits (h-n), graphed separately for two independent *slnrc4a* mutant lines: *slnrc4a-2* (black bars) and *slnrc4a-5* (gray bars).

**(a-b)** Lesion area was measured 3 days after inoculation with *B. cinerea* ( $10 \times 10^6$  spores/mL), **(a)**, or *S. sclerotiorum* **(b)**. *O. neolyopersici* infection was measured as percentage of infected leaf out of total leaf area **(c)**. **(d)** Infestation was determined by counting number of insects per leaf and measuring % of infected leaf area two-weeks after *T. absoluta* exposure. **(a-d)** Average  $\pm$  SEM of 3-4 independent replicates is shown. Asterisks represent statistical significance in t-test with Welch's correction (\*, p-value <0.05; \*\*, p-value <0.01; \*\*\*, p-value <0.001).

**(e-g)** Ethylene production of M82 and *slnrc4a* samples was measured using gas-chromatography **(e)**. M82 average ethylene production is defined as 100%. Average  $\pm$  SEM of 5 independent experiments is presented. Letters represent statistical significance in t-test with Welch's correction. **(f)** Conductivity levels of M82 and *slnrc4a* samples immersed in water for 24 h was measured. Average  $\pm$  SEM of 4 independent replicates is shown (one-way ANOVA, no significant difference) **(g)** Gene expression analysis of pathogen responsive genes in M82 and *slnrc4a* plants was measured by RT-qPCR. Relative expression normalized to M82. Average  $\pm$  SEM of three independent replicates is shown. Asterisks represent statistical significance in t-test with Welch's correction comparing each gene (\*, p-value <0.05; \*\*, p-value <0.01; \*\*\*, p-value <0.001).

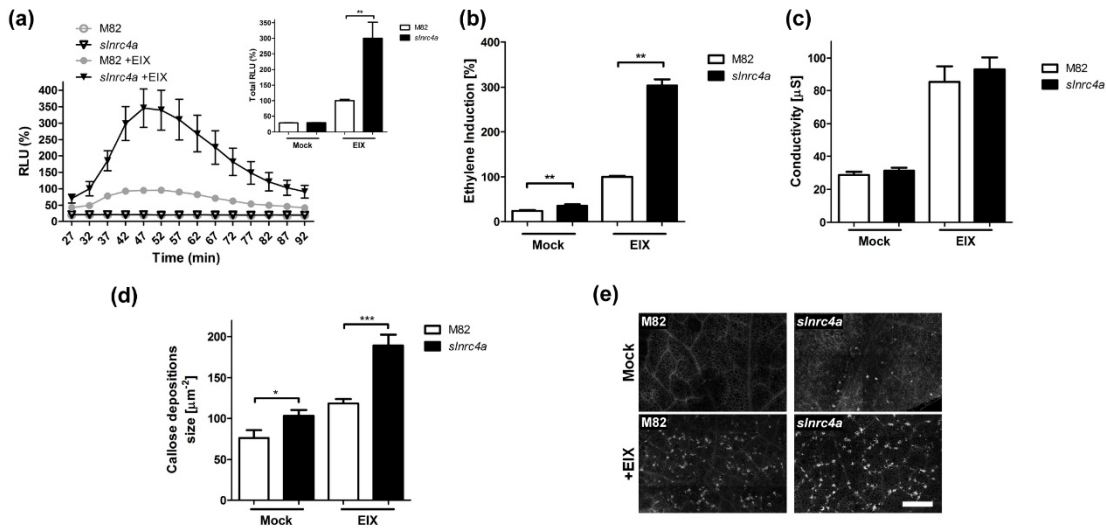

**Supplementary Figure 2: Enhanced MAMP-elicited defense responses in *slnrc4a* gain of function mutants.**

**(a)** ROS production of WT (M82) and *slnrc4a* was measured immediately after EIX application and measured every 5 min for 90 minutes using HRP-luminol method. Average  $\pm$  SEM of 4 independent replicates is shown (two-way ANOVA. p-value <0.01). Inset shows total ROS production (one-way ANOVA. \*\*, p-value <0.01).

**(b)** Ethylene induction after EIX elicitation in M82 and *slnrc4a* samples was measured using gas-chromatography. M82 average ethylene production after elicitation is defined as 100%, average  $\pm$  SEM of 5 independent experiments is presented. Asterisks represent statistical significance in t-test with Welch's correction (\*\*, p-value <0.01).

**(c)** Conductivity of M82 and *slnrc4a* samples immersed in water supplemented with EIX for 24 h was measured. Average  $\pm$  SEM of 4 independent replicates is shown (one-way ANOVA. No significant difference)

**(d)** Twenty-four h after EIX elicitation, callose deposition was observed by confocal microscopy after aniline blue staining of M82 and *slnrc4a* leaf discs. Callose deposit size was measured using the object counting tool of ImageJ. Average  $\pm$  SEM of three independent replicates is shown. Asterisks represent statistical significance in t-test with Welch's correction (\*, p-value <0.05; \*\*\*, p-value <0.001).

**(e)** Callose deposition representative images. Scale bar = 200 µm.

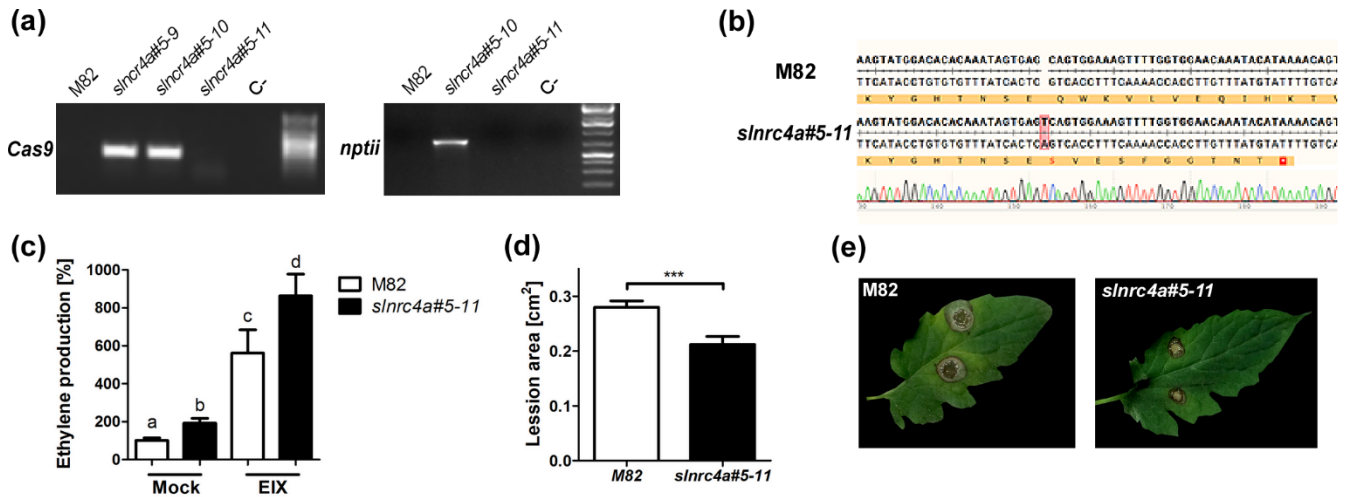

### Supplementary Figure 3: Cas9-free *slnrc4a* line maintains enhanced MAMP-elicited response.

**(a)** PCR analysis for *Cas9* and *nptII* presence in tomatoes from the T3 generation lines of *slnrc4a-5* edited line.

**(b)** Alignment of *slnrc4a* gene sequence of M82 and *slnrc4a#5-11* lines, corroborating the editing on 171 nucleotide (CDS).

**(c)** Ethylene induction in steady-state and after EIX elicitation in M82 and *slnrc4a* samples was measured using gas-chromatography. M82 average ethylene production is defined as 100%. Average  $\pm$  SEM ( $N_{\text{total}}=20$ ). Asterisks represent statistical significance in One-way ANOVA, Dunns post-test ( $p\text{-value} < 0.05$ ).

**(d)** Lesion area was measured three days after inoculation with *B. cinerea* ( $10 \times 10^6$  spores/mL). Average  $\pm$  SEM ( $N_{\text{total}}=70$ ). Asterisk represent statistical significant in t-test with Welch's correction (\*\*\*,  $p\text{-value} < 0.001$ ).

**(e)** Representative image of infection quantified in (d).

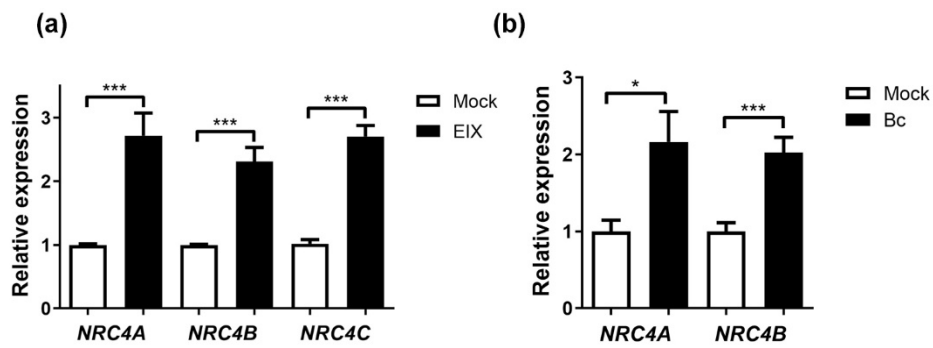

**Supplementary Figure 4: Members of the NRC4 clade are induced by EIX and *B. cinerea***

Gene expression analysis of NRC4 clade members in response to EIX treatment **(a)** and *B. cinerea* inoculation **(b)** was measured in WT M82 plants by RT-qPCR. Relative expression normalized to M82 Mock. Average  $\pm$  SEM of three independent replicates is shown,  $N > 7$  for each treatment. Asterisks represent statistical significance in t-test with Welch's correction comparing each gene (\*, p-value  $< 0.05$ ; \*\*\*, p-value  $< 0.001$ ).

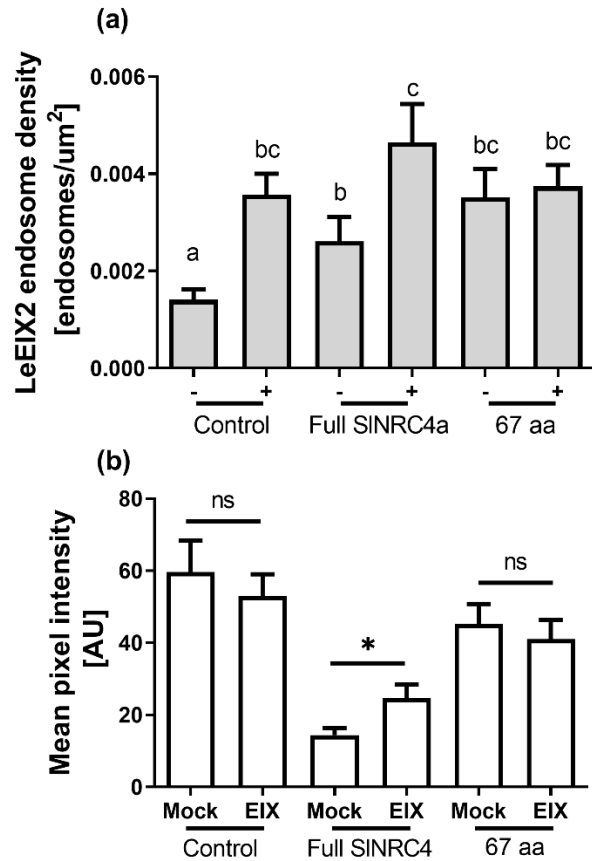

### Supplementary Figure 5: The 67 aa *slnrc4a* peptide affects LeEIX2 in a ligand independent manner

*N. benthamiana* leaves transiently expressing LeEIX2-GFP and free mCherry (Control), the full SINRC4a-mCherry, or the predicted 67 amino acid-mCherry (peptide present in the *slnrc4a* mutant) as indicated, were treated with EIX ( $1 \mu\text{g g}^{-1}$  tissue) or water (mock) at the petiole 40 hours after transformation.

**(a)** LeEIX2-GFP endosomes were visualized by confocal microscopy 15 minutes post EIX treatment. LeEIX2-GFP endosome density with (+) and without (-) EIX was quantified using 3D object counter (Fiji-ImageJ). Error bars represent the average  $\pm$  SEM of four independent replicates, five images each. Letters indicate significant differences from the control, two-tailed t-test.

**(b)** mCherry, SINRC4a-mCherry, or the predicted 67 amino acid-mCherry protein expression level (mean pixel intensity of mCherry signal) was quantified using FIJI-ImageJ. Sixteen images from four experiments were analyzed. Error bars represent the average  $\pm$  SEM. Asterisk indicates significant difference (two-tailed t-test,  $P < 0.05$ ).

Data adapted from Leibman-Markus et al., 2018b.

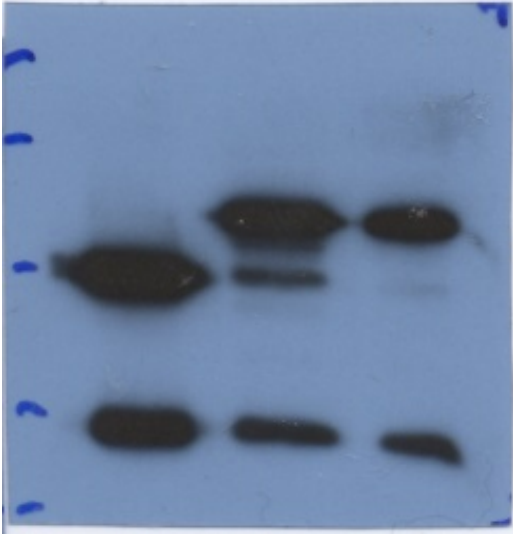

**Supplementary Figure 6: Original uncropped image of the blot presented in Figure 7c.**

**Supplementary Table 1: Analysis of volatile metabolites in M82 (WT) and *slnrc4a* lines.** Concentration of volatile compounds in M82 (WT) and *slnrc4a* plants were quantified using Gas Chromatography (ng per g of fresh weight = ng/gfw). The values are also expressed percentage of the concentration detected in WT. Asterisks represent statistical significance in t-test with Welch's correction (\*\*\*, p-value <0.001; \*\*, p-value <0.01; \*, p-value <0.05 ).

| GROUP                  | Compound                               | WT               |        |      | <i>slnrc4a</i> |       |        | T-test Welch's correction |     |
|------------------------|----------------------------------------|------------------|--------|------|----------------|-------|--------|---------------------------|-----|
|                        |                                        | Average [ng/gfw] | SD     | %    | Average        | SD    | %      | P-Value                   |     |
| Fatty acid             | 2,3- Butanediol                        | 11.6             | 7.3    | 100  | 100.3          | 48.5  | 868.2  | 0.0003                    | *** |
|                        | Penten-3-ol                            | 42.6             | 17.8   | 100  | 65.2           | 8.0   | 153.0  | 0.0963                    | NS  |
|                        | 1-Penten-3-one                         | 35.0             | 6.5    | 100  | 61.1           | 24.7  | 174.6  | 0.0125                    | *   |
|                        | Pentanal                               | 48.8             | 15.3   | 100  | 35.0           | 29.3  | 71.7   | 0.3321                    | NS  |
|                        | Hexanal                                | 442.7            | 111.4  | 100  | 299.6          | 149.6 | 67.7   | 0.127                     | NS  |
|                        | 2E-Hexenal                             | 2149.8           | 370.8  | 100  | 2113.1         | 448.9 | 98.3   | 0.8989                    | NS  |
|                        | Hexanol                                | 245.4            | 51.2   | 100  | 136.1          | 27.2  | 55.4   | 0.0137                    | *   |
|                        | 2E- Heptenal                           | 153.6            | 49.0   | 100  | 160.4          | 21.3  | 104.4  | 0.8418                    | NS  |
|                        | 2E,4E- Heptadienal                     | 118.3            | 36.5   | 100  | 74.8           | 22.0  | 63.3   | 0.1161                    | NS  |
| Monoterpene            | alpha-Pinene                           | 669.9            | 280.3  | 100  | 1146.2         | 199.6 | 171.1  | 0.0372                    | *   |
|                        | 3,7,7-trimethyl-1,3,5-Cycloheptatriene | 417.6            | 115.0  | 100  | 684.8          | 80.0  | 164.0  | 0.0086                    | **  |
|                        | b-Pinene                               | 1238.3           | 208.7  | 100  | 1171.6         | 113.2 | 94.6   | 0.651                     | NS  |
|                        | d- 2-Carene                            | 1581.0           | 371.2  | 100  | 2511.4         | 245.1 | 158.9  | 0.0055                    | **  |
|                        | α-Phellandrene                         | 685.3            | 151.1  | 100  | 1036.4         | 105.6 | 151.2  | 0.0086                    | **  |
|                        | α-Terpinene                            | 131.6            | 25.2   | 100  | 179.5          | 21.4  | 136.4  | 0.0235                    | *   |
|                        | p-Cymene                               | 190.6            | 23.2   | 100  | 269.6          | 32.2  | 141.4  | 0.001                     | **  |
|                        | b- Phellandrene                        | 5879.7           | 1036.4 | 100  | 8824.2         | 847.5 | 150.1  | 0.003                     | **  |
|                        | γ-Terpinene                            | 60.8             | 7.6    | 100  | 116.6          | 19.5  | 191.8  | < 0.0001                  | *** |
|                        | Terpinolene                            | 23.8             | 4.6    | 100  | 34.0           | 4.1   | 142.4  | 0.012                     | *   |
| Cryptone               | 46.2                                   | 11.4             | 100    | 75.1 | 14.1           | 162.5 | 0.0069 | **                        |     |
| sesquiterpene          | E-Caryophyllene                        | 119.1            | 21.4   | 100  | 196.3          | 54.7  | 164.8  | 0.0042                    | **  |
|                        | Humulen-(v1)                           | 39.5             | 9.6    | 100  | 66.1           | 11.3  | 167.2  | 0.0038                    | **  |
|                        | α-Humulene                             | 86.6             | 8.3    | 100  | 115.7          | 28.0  | 133.6  | 0.0163                    | *   |
| phenylpropanoid        | Benzaldehyde                           | 429.5            | 30.7   | 100  | 249.0          | 59.6  | 58.0   | < 0.0001                  | *** |
|                        | Benzyl alcohol                         | 93.4             | 32.7   | 100  | 113.1          | 27.3  | 121.1  | 0.4169                    | NS  |
|                        | o- Guaiacol                            | 190.2            | 82.2   | 100  | 212.6          | 73.9  | 111.8  | 0.7122                    | NS  |
|                        | Phenyl ethyl alcohol                   | 384.9            | 31.2   | 100  | 572.3          | 93.9  | 148.7  | 0.0002                    | *** |
|                        | Methyl salicylate                      | 743.4            | 163.4  | 100  | 1004.0         | 113.3 | 135.1  | 0.0471                    | *   |
|                        | Eugenol                                | 40.0             | 9.7    | 100  | 64.3           | 15.8  | 160.7  | 0.0102                    | *   |
| carotenoid derivatives | b-Cyclocitral                          | 211.8            | 46.1   | 100  | 305.7          | 33.4  | 144.4  | 0.0169                    | *   |
|                        | b- Ionone                              | 481.1            | 128.1  | 100  | 627.8          | 116.1 | 130.5  | 0.1418                    | NS  |

**Supplementary Table 2: Primers used in this work.**

| <b>Locus</b>   | <b>Name</b>            | <b>Forward</b>              | <b>Reverse</b>        | <b>Reference</b>     |
|----------------|------------------------|-----------------------------|-----------------------|----------------------|
| Solyc01g106620 | PR1a                   | CTGGTGCTGTGAAGATGTGG        | TGACCCTAGCACAACCAAGA  | (Harel et al., 2014) |
| Solyc00g174340 | PR1b                   | GTGTCCGAGAGGCCAAGCTA        | AGGACGTTGTCCGATCCAGTT |                      |
| Solyc01g097270 | Pathogen induced 1     | TGCTTAAGGGTGACAAATACA<br>CG | ACATTCACATTGTCACCGCA  |                      |
| Solyc03g020050 | Proteinase inhibitor 2 | CGACGTGTTGCACTGGTTAC        | TGCCAATCCAGAAGATGGAC  | (Harel et al., 2014) |
| Solyc10g055800 | Chitinase 2            | AATGGTGGCCTAGAACGTGG        | AGCTGAGTCCAACAGACTACA |                      |
| Solyc01g060020 | beta-1,3-glucanase     | TCGAACAGGAGGAGGATCTG        | TCCAGGCTTTCTCGGACTAC  | (Harel et al., 2014) |
| Solyc02g077370 | Pti 5                  | GACATGGTGCAGAGATATGG        | CTGAAACAGAGGCGTTCCT   | (Harel et al., 2014) |
| Solyc07g008600 | LRR-RLK-EXS            | TCAGTAGGGCTCGCTAACCT        | GAAGAGGAGGGCCACATAGC  |                      |
| Solyc03G123860 | RLK-INRPK1c            | TGCTACTCTAGGCCAGCTCA        | TGCAACTGGGTGAGTGATCC  | (Yang et al., 2017)  |
| Solyc02G070890 | FLS2                   | GGGTTGGGGCAGTTATCCAA        | GGTGAATGGCACCTGAGAA   |                      |
| Solyc08G016310 | LRR-RLP                | TCACTGGGGAGATTCCGAGA        | GTCCAGTCCACCACCAAT    | (Yang et al., 2017)  |
